# Supplementary material for: Phosphorus modulation of a mesoporous rhodium film for enhanced nitrogen electroreduction
Source: Royal Society of Chemistry journal article supplement (doi:10.1039/d1nr03074d), 2021-01-01
Supplement: d1nr03074d1.pdf [file d1nr03074d1.pdf]

Electronic Supplementary Information for

**Phosphorus modulation of mesoporous rhodium film for enhanced  
nitrogen electroreduction**

Ziqiang Wang, Wenjing Tian, Hongjie Yu, Tongqing Zhou, Peng Wang, You Xu, Xiaonian Li,

Liang Wang and Hongjing Wang\*

State Key Laboratory Breeding Base of Green-Chemical Synthesis Technology, College of  
Chemical Engineering, Zhejiang University of Technology, Hangzhou 310014, P. R. China

**Corresponding author**

\*E-mail: [hjw@zjut.edu.cn](mailto:hjw@zjut.edu.cn)

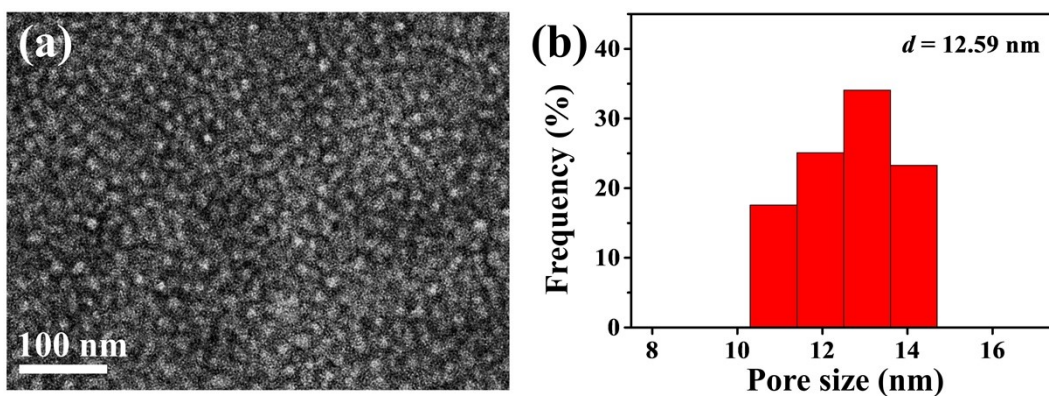

Fig. S1 TEM image and corresponding pore size distribution of the P-mRh/NF.

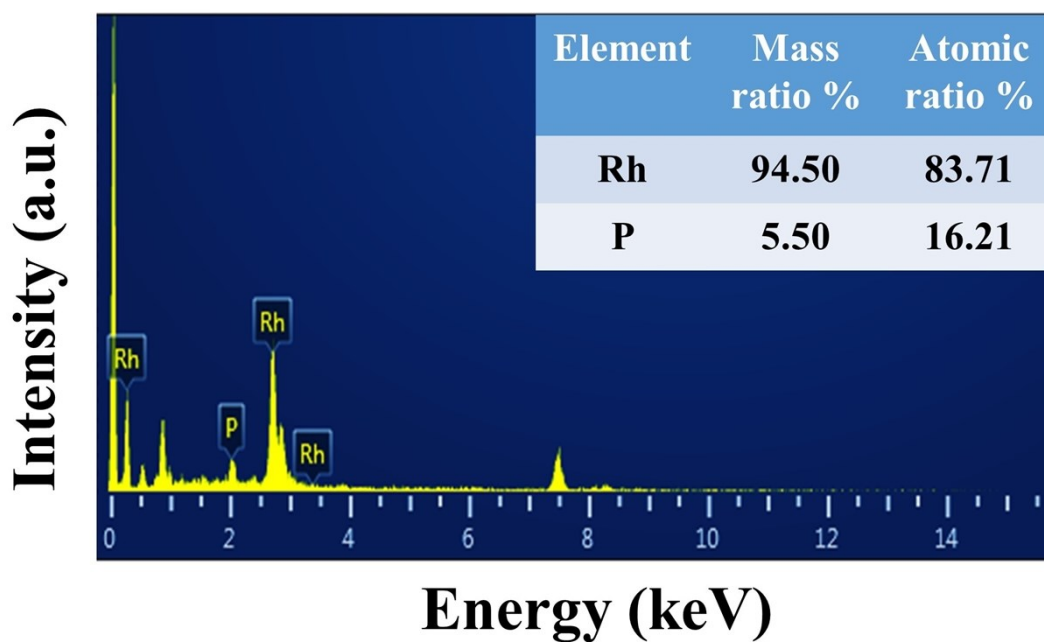

Fig. S2 EDX spectrum of the P-mRh film and corresponding element amount.

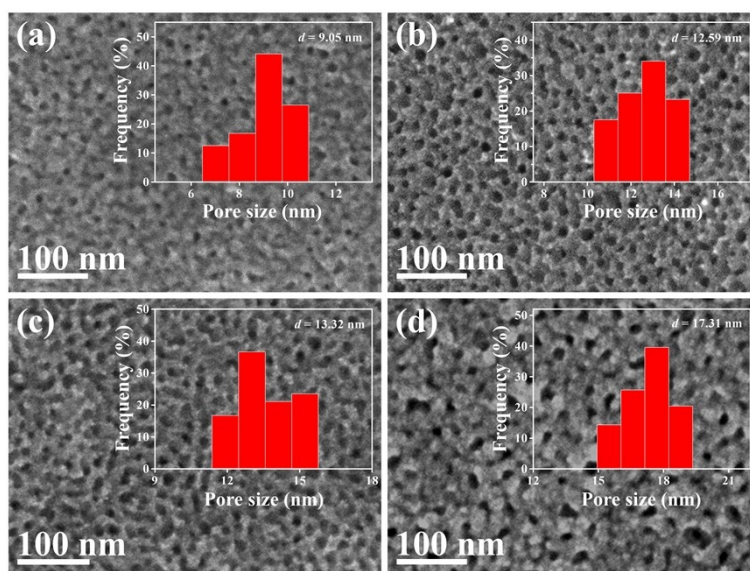

**Fig. S3** SEM images and corresponding pore size distribution of P-mRh/NF obtained in different amount of THF: (a) 0.25 mL, (b) 0.5 mL, (b) 1.0 mL, and (d) 1.5 mL.

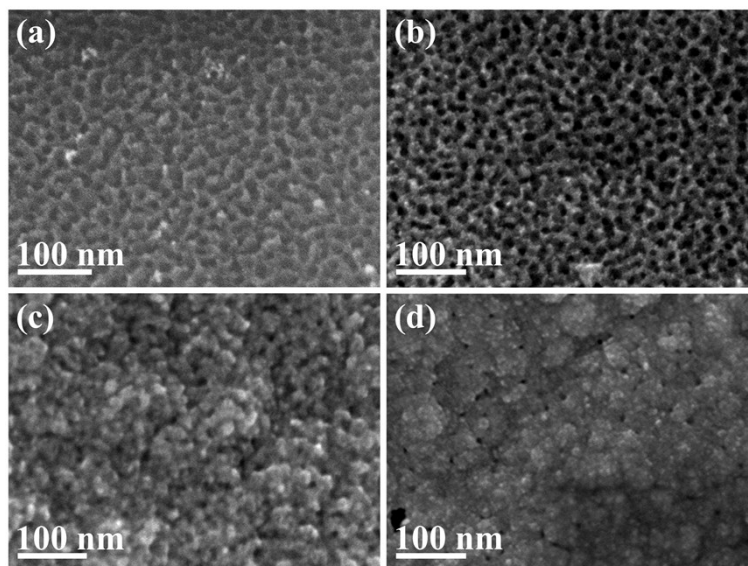

**Fig. S4** SEM images of P-mRh/NF obtained by electrodeposition of different molar concentrations of sodium hypophosphite solution: (a) 0 mM, (b) 2.5 mM, (b) 10 mM, and (d) 20 mM.

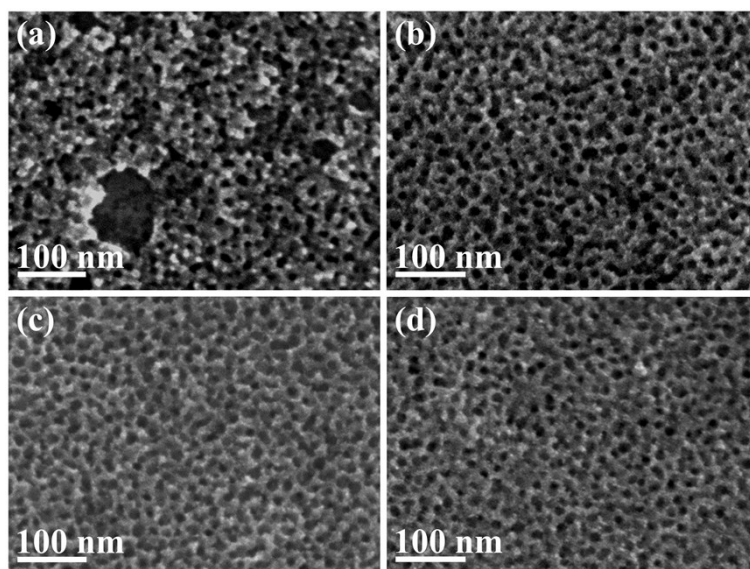

**Fig. S5** SEM images of typical samples at different electrodeposition times for (a) 500 s, (b) 1000 s, (c) 2000 s, and (d) 4000 s.

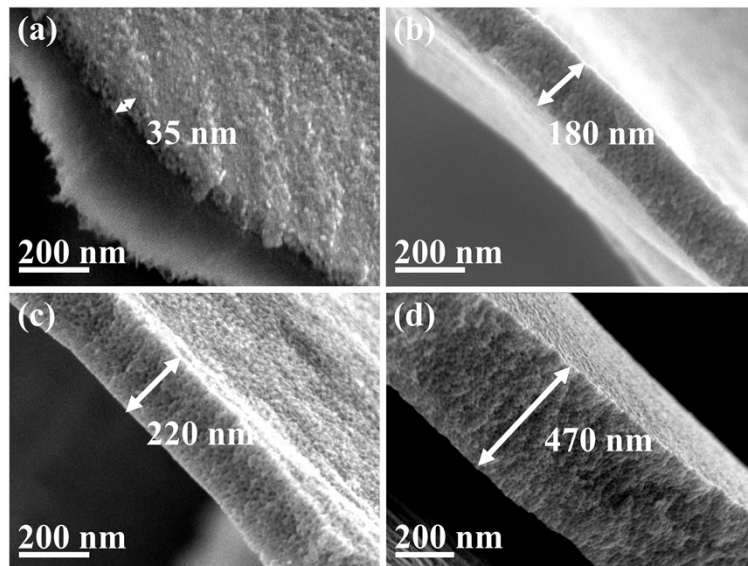

**Fig. S6** SEM images of cross-sections of typical samples at different electrodeposition times for (a) 500 s, (b) 1000 s, (c) 2000 s, and (d) 4000 s.

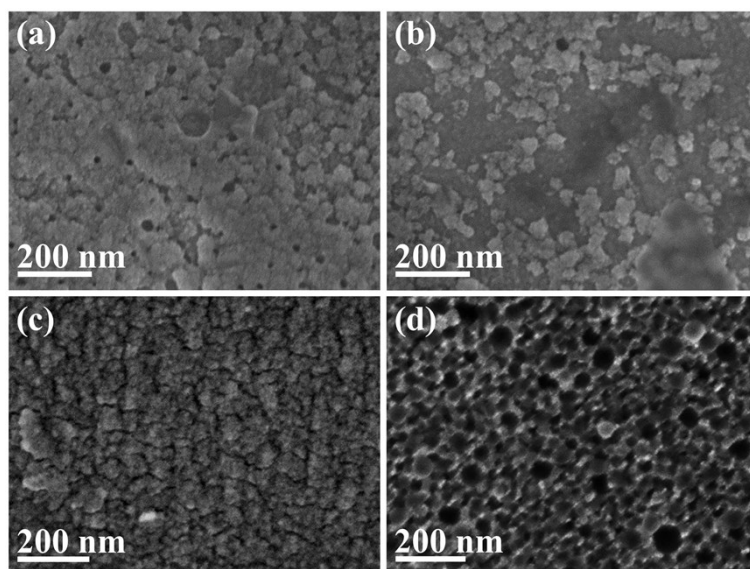

**Fig. S7** SEM images of the P-mRh/NF prepared by changing surfactant with (a) F127, (b) Brij 58, (c) DM970, and (d) PS-*b*-PEO.

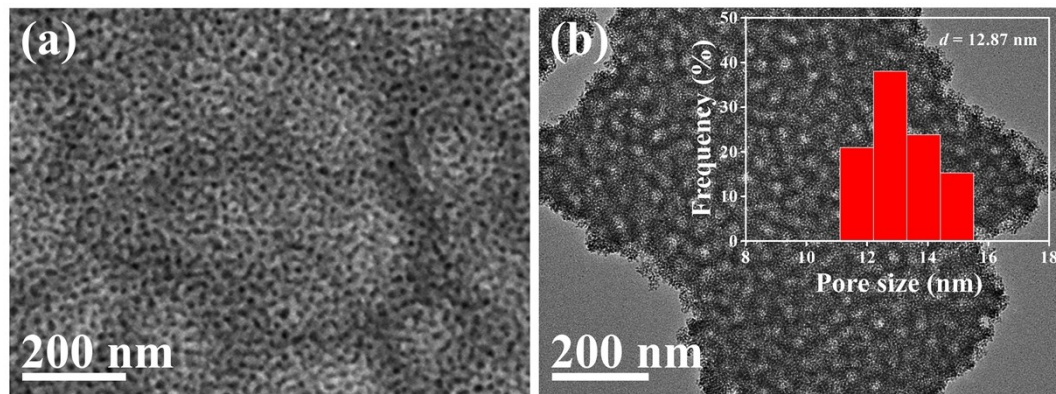

**Fig. S8** (a) SEM image of P-mRh/CP. (b) TEM image and corresponding pore size distribution of the P-mRh film.

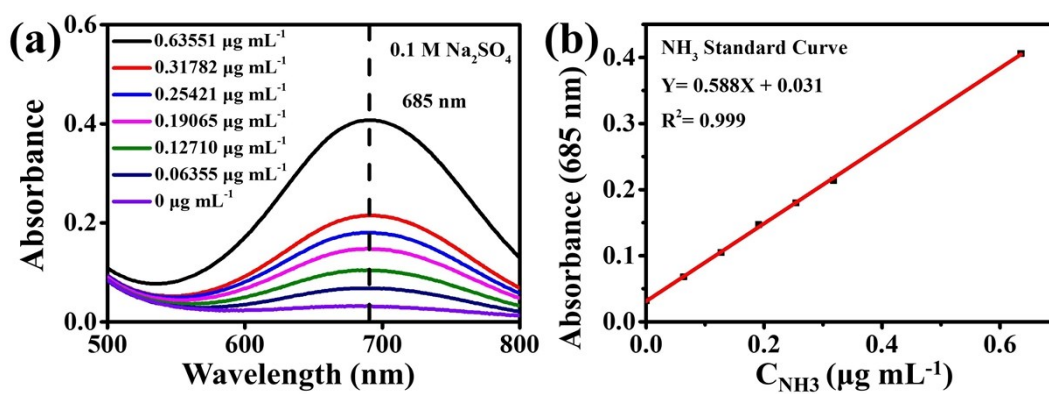

**Fig. S9** (a) UV-vis absorption spectroscopy of various  $\text{NH}_4^+$  concentrations with the color reagent for 1 h at room temperature. (b) Calibration curve used to estimate the concentrations of  $\text{NH}_3$ .

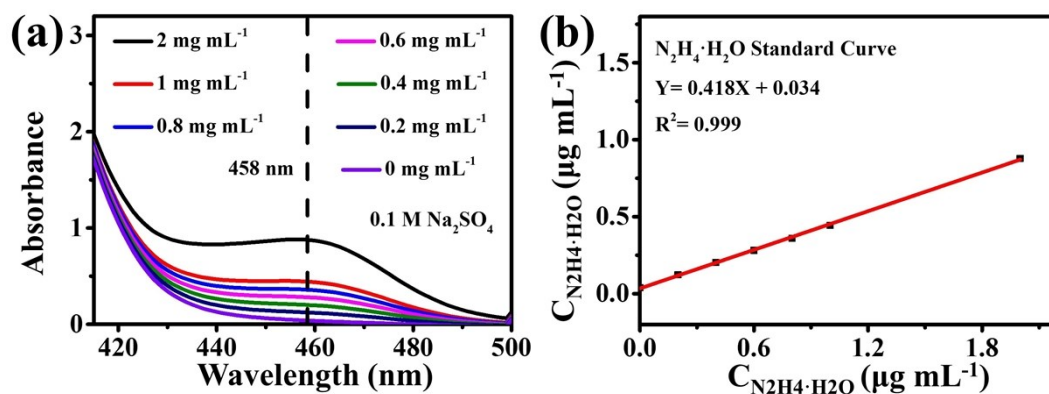

**Fig. S10** (a) UV-Vis curves of different concentrations of hydration solution were measured after incubated for 15 min at 25 °C. (b) Calibration curve used for estimation of  $\text{N}_2\text{H}_4\cdot\text{H}_2\text{O}$  concentration.

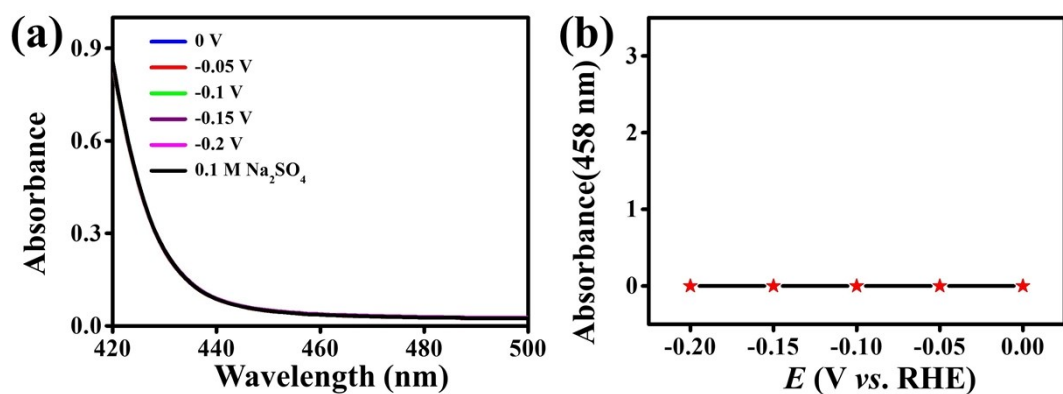

**Fig. S11** UV-vis spectra of the electrolytes after 2h electrolysis in nitrogen at different potentials and (b) the  $\text{N}_2\text{H}_4 \cdot \text{H}_2\text{O}$  concentration of the electrolyte.

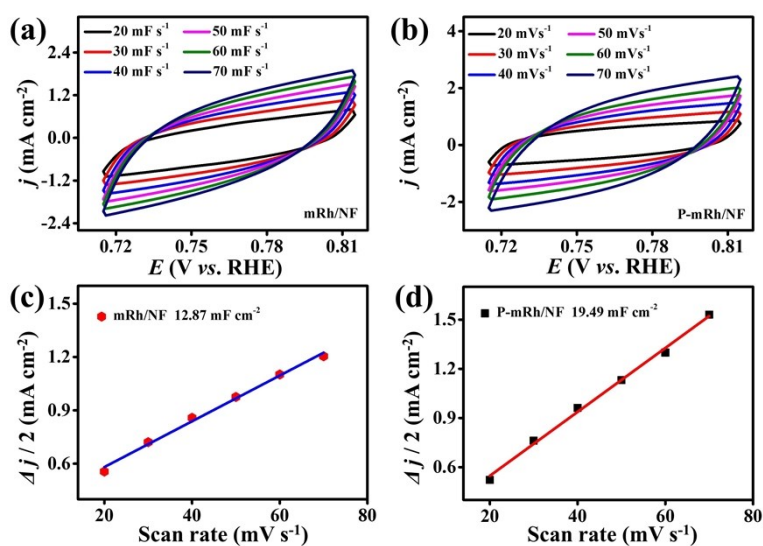

**Fig. S12** CV curves of mRh/NF (a) and P-mRh/NF (b) in the range of 0.08 and 0.18 V. Capacitive current densities derived from CVs at 0.765 V against scan rates for mRh/NF (c) and P-mRh/NF (d).

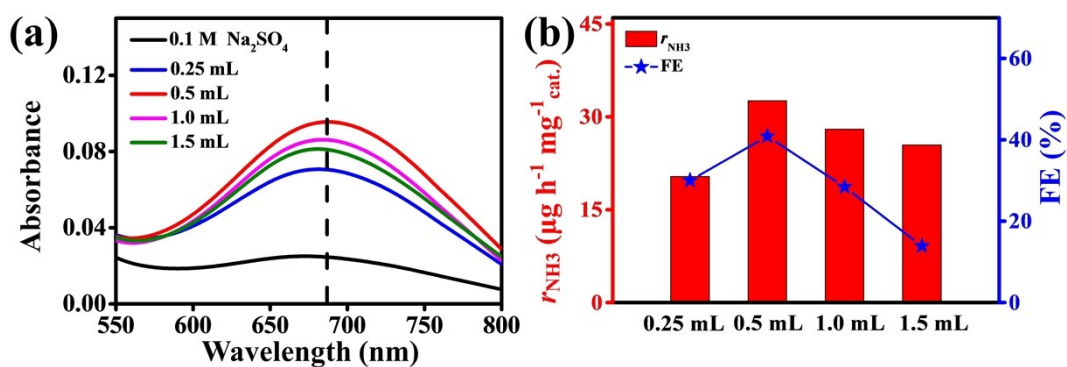

**Fig. S13** (a) UV-Vis absorption spectra of P-mRh/NF obtained from different amounts of THF and (b) corresponding FE and  $r_{\text{NH}_3}$ .

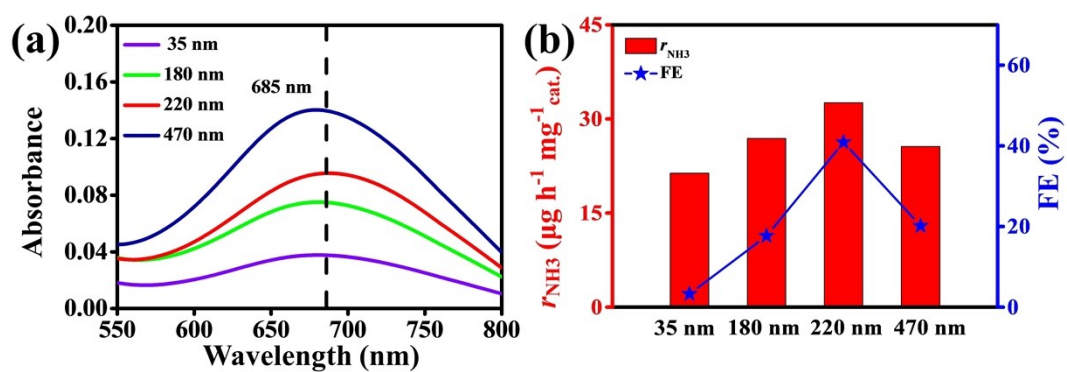

**Fig. S14** (a) UV-Vis absorption spectra of samples with different thickness and (b) corresponding Faraday efficiencies and NH<sub>3</sub> yields.



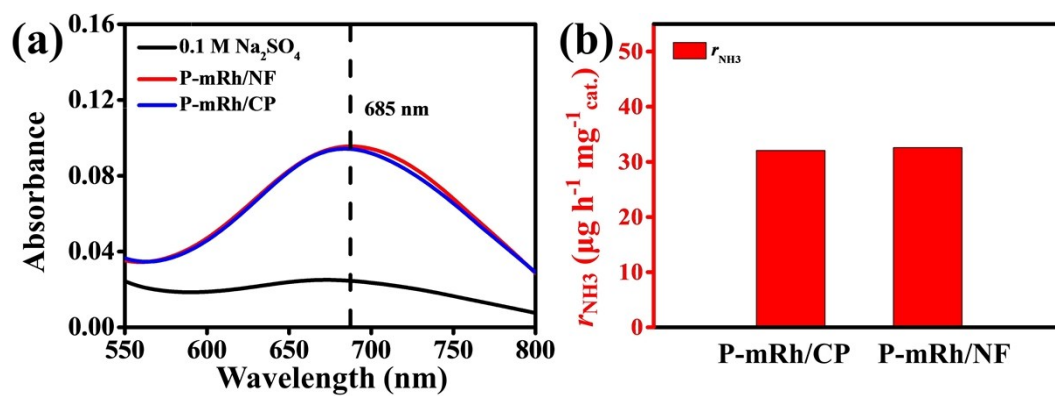

**Fig. S15** UV-Vis absorption spectra of P-mRh/NF and P-mRh/CP and (b) corresponding  $r_{\text{NH}_3}$ .

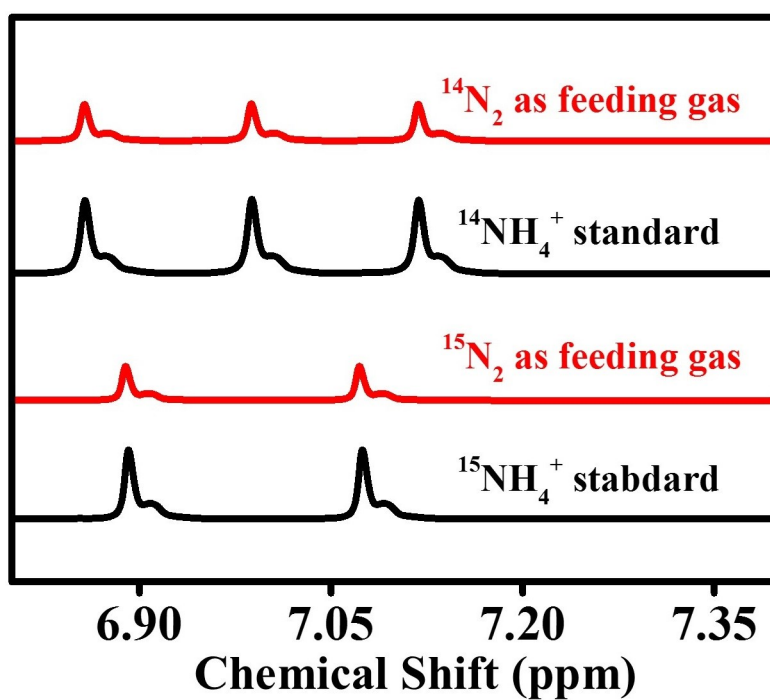

**Fig. S16** <sup>1</sup>H-NMR spectra of standard <sup>14</sup>NH<sub>4</sub><sup>+</sup>, <sup>15</sup>NH<sub>4</sub><sup>+</sup> solution, and the electrolytes produced from the NRR reaction using <sup>14</sup>N<sub>2</sub> and <sup>15</sup>N<sub>2</sub> as the N<sub>2</sub> source.

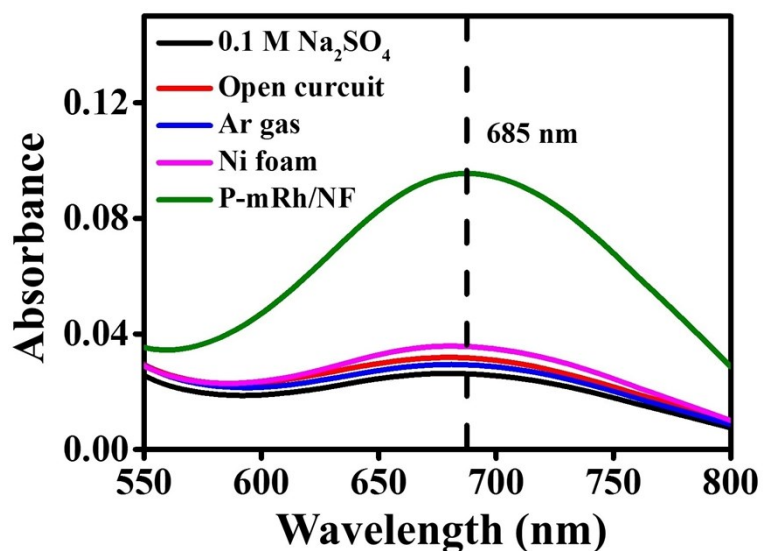

**Fig. S17** UV-vis absorption spectra of the electrolytes under different conditions.

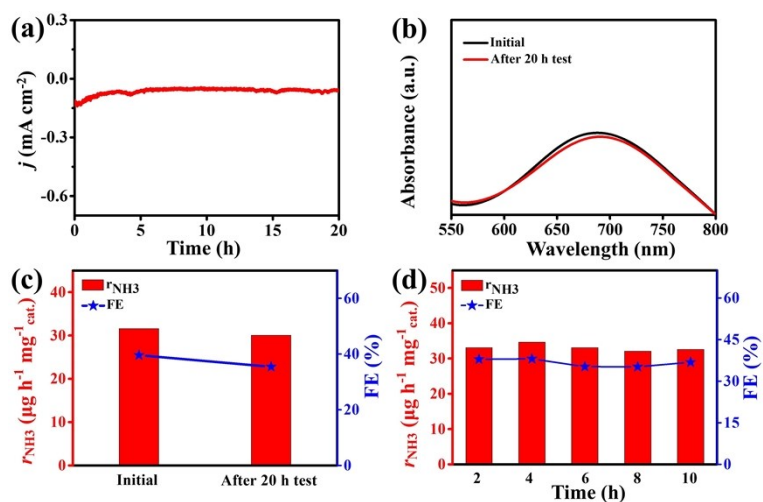

**Fig. S18** (a) Chronocurrent curves of typical potentials for 20 h. (b) UV-vis absorption spectra of the electrolytes before and after the durability tests and (c) their  $\text{NH}_3$  yield and FE. (d) The  $\text{NH}_3$  yields and corresponding FE after five cycle measurements.

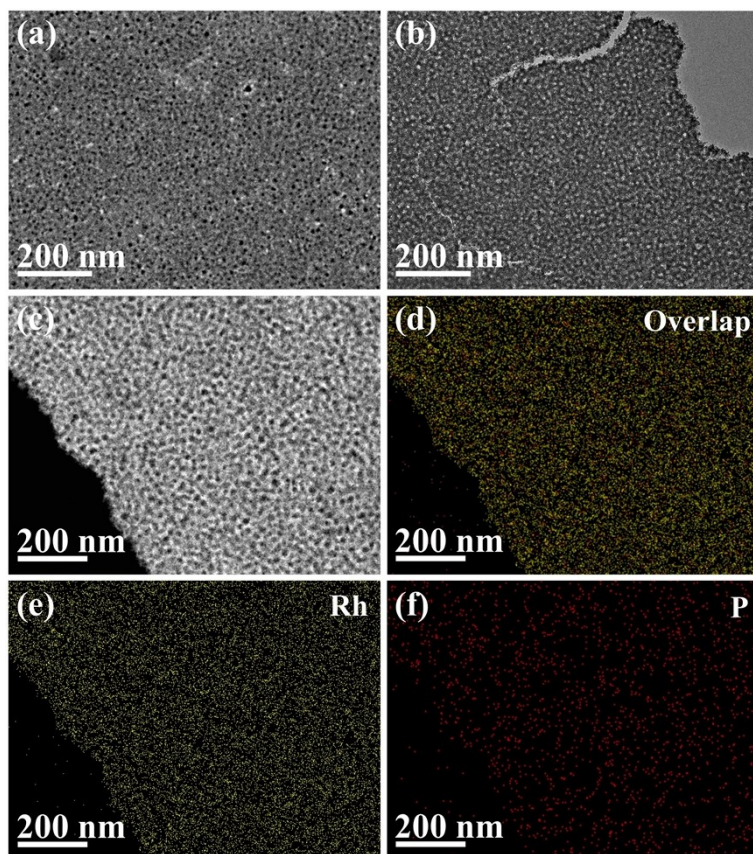

**Fig. S19** Characterization of the morphology and composition of the P-mRh/NF after the durability test. (a) SEM image of of the P-mRh/NF, and (b) TEM iamge, (c) HAADF-STEM and (d-f) corresponding EDX elemental mapping images of the P-mRh film.

**Table S1** The mass percentage of P in the P-mRh/NF obtained from different molar concentrations of sodium hypophosphite solution.

| <b>Samples</b>           | <b>Phosphorus percentage (wt%)</b> |
|--------------------------|------------------------------------|
| P <sub>2.5</sub> -mRh/NF | 2.99                               |
| P <sub>10</sub> -mRh/NF  | 9.62                               |
| P <sub>20</sub> -mRh/NF  | 13.03                              |

**Table S2** The comparisons of the NRR performance of the P-mRh/NF with the representative reported catalysts under ambient conditions.

| Catalyst                    | Electrolyte                               | NH <sub>3</sub> yield                                         | FE (%)       | Ref.             |
|-----------------------------|-------------------------------------------|---------------------------------------------------------------|--------------|------------------|
| <b>P-mRh/NF</b>             | <b>0.1 M Na<sub>2</sub>SO<sub>4</sub></b> | <b>32.57 μg h<sup>-1</sup> mg<sup>-1</sup><sub>cat.</sub></b> | <b>40.86</b> | <b>This work</b> |
| Ag film                     | 0.1 M Na <sub>2</sub> SO <sub>4</sub>     | 1.27 μg h <sup>-1</sup> cm <sup>-2</sup>                      | 7.36         | 1                |
| mAu <sub>3</sub> Pd/NF      | 0.1 M Na <sub>2</sub> SO <sub>4</sub>     | 24.02 μg h <sup>-1</sup> mg <sup>-1</sup> <sub>cat.</sub>     | 18.16        | 2                |
| Porous Au Film              | 0.1 M Na <sub>2</sub> SO <sub>4</sub>     | 9.42 μg h <sup>-1</sup> cm <sup>-2</sup>                      | 13.36        | 3                |
| PdCuIr-LS                   | 0.1 M Na <sub>2</sub> SO <sub>4</sub>     | 113.43 μg h <sup>-1</sup> mg <sup>-1</sup> <sub>cat.</sub>    | 1.84         | 4                |
| MoS <sub>2</sub> nanoflower | 0.1 M Na <sub>2</sub> SO <sub>4</sub>     | 29.28 μg h <sup>-1</sup> mg <sup>-1</sup> <sub>cat.</sub>     | 8.34         | 5                |
| NiO/G                       | 0.1 M Na <sub>2</sub> SO <sub>4</sub>     | 18.6 μg h <sup>-1</sup> mg <sup>-1</sup> <sub>cat.</sub>      | 7.8          | 6                |
| Mo <sub>2</sub> N nanorods  | 0.1 M HCl                                 | 78.4 μg h <sup>-1</sup> mg <sup>-1</sup> <sub>cat.</sub>      | 4.5          | 7                |
| dendritic Cu                | 0.1 M HCl                                 | 25.63 μg h <sup>-1</sup> mg <sup>-1</sup> <sub>cat.</sub>     | 15.12        | 8                |
| Bi nanodendrites            | 0.1 M HCl                                 | 25.86 μg h <sup>-1</sup> mg <sup>-1</sup> <sub>cat.</sub>     | 10.8         | 9                |
| Au/Bi NSs                   | 0.1 M HCl                                 | 20.39 μg h <sup>-1</sup> mg <sup>-1</sup> <sub>cat.</sub>     | 15.53        | 10               |

## References

1. L. Ji, X. Shi, A. M. Asiri, B. Zheng and X. Sun, *Inorg. Chem.*, 2018, **57**, 14692-14697.
2. H. Yu, Z. Wang, S. Yin, C. Li, Y. Xu, X. Li, L. Wang and H. Wang, *ACS Appl. Mater. Interfaces*, 2020, **12**, 436-442.
3. H. Wang, H. Yu, Z. Wang, Y. Li, Y. Xu, X. Li, H. Xue and L. Wang, *Small*, 2019, **15**, 1804769.
4. R. D. Kumar, Z. Wang, C. Li, A. V. N. Kumar, H. Xue, Y. Xu, X. Li, L. Wang and H. Wang, *J. Mater. Chem. A*, 2019, **7**, 3190-3196.
5. X. Li, T. Li, Y. Ma, Q. Wei, W. Qiu, H. Guo, X. Shi, P. Zhang, A. M. Asiri, L. Chen, B. Tang and X. Sun, *Adv. Energy Mater.*, 2018, **8**, 1801357.
6. K. Chu, Y.-p. Liu, J. Wang and H. Zhang, *ACS Appl. Energy Mater.*, 2019, **2**, 2288-2295.
7. X. Ren, G. Cui, L. Chen, F. Xie, Q. Wei, Z. Tian and X. Sun, *Chem. Commun.*, 2018, **54**, 8474-8477.
8. C. Li, S. Mou, X. Zhu, F. Wang, Y. Wang, Y. Qiao, X. Shi, Y. Luo, B. Zheng, Q. Li and X. Sun, *Chem. Commun.*, 2019, **55**, 14474-14477.
9. F. Wang, X. Lv, X. Zhu, J. Du, S. Lu, A. A. Alshehri, K. A. Alzahrani, B. Zheng and X. Sun, *Chem. Commun.*, 2020, **56**, 2107-2110.
10. Y. Xu, T. Ren, S. Yu, K. Ren, M. Wang, Z. Wang, X. Li, L. Wang and H. Wang, *Sustainable Energy Fuels*, 2020, **4**, 4516-4521.
